# Supplementary material for: A zebrafish Notum homolog specifically blocks the Wnt/β-catenin signaling pathway
Source: Oxford University Press journal article supplement (doi:10.1242/dev.063206), 2012-06-05
Supplement: dev063206tables1.pdf [file dev063206tables1.pdf]

**Table S1.** The following probes were used for in situ hybridization

| <b>Gene/probe</b>     | <b>ZFIN ID Number</b> | <b>Accession Number</b> |
|-----------------------|-----------------------|-------------------------|
| <i>notum1a</i>        |                       | EU728672                |
| <i>tbx6</i>           | ZDB-GENE-980526-171   | NM 131052               |
| <i>gsc</i>            | ZDB-GENE-980528-2060  | NM 131017               |
| <i>sp5l</i>           | ZDB-GENE-030131-2981  | NM 194371               |
| <i>rx3</i>            | ZDB-GENE-990415-238   | NM 131277               |
| <i>pax2a</i>          | ZDB-GENE-990415-8     | NM 131184               |
| <i>egr2b (krox20)</i> | ZDB-GENE-980526-283   | NM 130997               |
| <i>myod1</i>          | ZDB-GENE-980526-561   | NM 131262               |
| <i>sox32</i>          | ZDB-GENE-011026-1     | NM 131851               |
| <i>msxc</i>           | ZDB-GENE-980526-306   | NM 131272               |
| <i>bmp4</i>           | ZDB-GENE-980528-2059  | NM 131342               |
| <i>foxa</i>           | ZDB-GENE-990415-76    | NM 131282               |
| <i>pax3a</i>          | ZDB-GENE-980526-52    | NM 131277               |
| <i>pax6a</i>          | ZDB-GENE-990415-200   | NM 131304               |
| <i>lhx3</i>           | ZDB-GENE-980526-131   | NM 131208               |
| <i>dkk1b</i>          | ZDB-GENE-990708-5     | NM 131003               |
| <i>pea3</i>           | ZDB-GENE-990415-71    | NM 131425               |
| <i>spry4</i>          | ZDB-GENE-010803-2     | NM 131826               |
